# Supplementary material for: One hundred years of zoonoses research in the Horn of Africa: A scoping review
Source: PLoS Negl Trop Dis. 2021 Jul 16;15(7):e0009607. doi: 10.1371/journal.pntd.0009607 (PMC8318308; doi:10.1371/journal.pntd.0009607)
Supplement: S6 Table — Note: the total number of publications and percentages do not add up to 100% as a single paper could report on more than 1 discipline/method. FGD = Focus group discussion. (XLSX) [file pntd.0009607.s006.xlsx]

## Sheet: S6 TABLE
S6 Table. Proportion of publications based on disciplinary/methodological approaches employed.
Note: the total number of publications and percentages do not add up to 100% as a single paper could report on more than 1 discipline/method.
FGD = Focus group discussion
	All papers	Anthrax	Brucellosis	Cysticercosis/Taeniasis	Echinococcosis	Gastrointestinal bacteria	Hepatits E	Leishmaniasis	Leptospirosis	Q fever	Rabies	Rift Valley fever	Toxoplasmosis	Trypanosomiasis	Tuberculosis
Epidemiology	0.753285	0.638298	0.898693	0.857143	0.830882	0.789062	0.818182	0.54717	0.914894	0.731707	0.531746	0.612022	0.89313	0.532934	0.758065
Epidemiology > Descriptive	0.510336	0.733333	0.407273	0.568627	0.606195	0.559406	0.555556	0.724138	0.813953	0.7	0.746269	0.455357	0.461538	0.382022	0.425532
Epidemiology > Observational	0.391473	0.0333333	0.527273	0.431373	0.336283	0.391089	0.444444	0.137931	0.186047	0.3	0.119403	0.276786	0.521368	0.213483	0.546099
Epidemiology > diagnostic test evaluation	0.0704134	0	0.105455	0.117647	0.10177	0.0049505	0.0444444	0.103448	0.0232558	0	0.0298507	0.0357143	0.0512821	0.123596	0.12766
Epidemiology > Ecological, spatial modelling	0.0258398	0	0.0109091	0	0	0.0049505	0.0222222	0	0.0232558	0.0333333	0	0.151786	0	0.101124	0
Epidemiology > Experimental	0.0245478	0.0333333	0.0181818	0.0294118	0.0132743	0.0148515	0	0.0344828	0	0	0.0447761	0.00892857	0.00854701	0.134831	0.0141844
Epidemiology > mathematical modelling	0.0193798	0	0.0109091	0.00980392	0	0.00990099	0.0666667	0.0344828	0	0	0.0447761	0.0535714	0.00854701	0.0449438	0.0070922
Epidemiology > Advanced statistical model	0.00968992	0	0.0109091	0.00980392	0	0.00990099	0	0	0	0	0	0.0357143	0	0.0337079	0
Epidemiology > participatory epidemiology	0.00968992	0.233333	0.00727273	0	0	0	0	0	0	0	0.0298507	0	0.00854701	0.0449438	0
Epidemiology > Other	0.0232558	0.0333333	0.0254545	0.0196078	0.00884956	0.029703	0	0	0	0	0.119403	0.0357143	0.00854701	0.0224719	0.0070922
Laboratory	0.310462	0.0638298	0.0784314	0.378151	0.419118	0.621094	0.0363636	0.377358	0.170213	0.121951	0.190476	0.103825	0.122137	0.383234	0.430108
Laboratory > in vitro	0.0626959	0	0.0416667	0	0.0263158	0.0628931	0	0.2	0	0	0.0833333	0.0526316	0	0.28125	0.025
Laboratory > in vivo	0.0877743	0.333333	0	0.0666667	0.0526316	0.00628931	0	0.1	0	0	0.5	0.157895	0.875	0.125	0.0125
Laboratory > Advanced taxonomic classification, phylogeny	0.615987	0	0.791667	0.0444444	0.210526	0.647799	1	0.7	1	1	0.541667	0.789474	0.5625	0.640625	0.8625
Laboratory > Drug resistance	0.180251	0.333333	0.0833333	0	0	0.622642	0	0	0	0	0	0	0	0.09375	0.0875
Laboratory > Pathobiology	0.261755	0.333333	0.0833333	0.911111	0.815789	0.0377358	0	0	0	0	0.0416667	0.0526316	0	0.0625	0.375
Laboratory > Other	0.00940439	0	0	0	0	0	0	0	0	0	0	0.0526316	0	0.046875	0
Social sciences	0.114842	0.340426	0.140523	0.159664	0.0919118	0.0507812	0.0727273	0.0377358	0.0212766	0.097561	0.285714	0.0765027	0.0687023	0.113772	0.177419
Social sciences > qualitative interviews	0.313559	0.5625	0.27907	0.210526	0.12	0.153846	0.75	0	0	0.5	0.277778	0.5	0.111111	0.736842	0.212121
Social sciences > quantitative surveys (KAP, etc.)	0.741525	0.375	0.837209	0.947368	0.84	0.692308	0.5	1	1	1	0.777778	0.5	0.888889	0.368421	0.939394
Social sciences > FGD	0.101695	0.1875	0.0465116	0	0.08	0.0769231	0.25	0	0	0	0.0277778	0.142857	0	0.210526	0.0606061
Social sciences > Other	0.152542	0.1875	0	0.0526316	0.12	0.153846	0.25	0.5	0	0	0.138889	0.214286	0	0.368421	0
Environmental science and environmental health	0.110949	0.0638298	0.0588235	0.0168067	0.00735294	0.226562	0.0909091	0.0943396	0.0212766	0.219512	0.0634921	0.251366	0	0.0958084	0.0268817
Environmental sciences > Entomology	0.548246	0.333333	0.166667	0	0	0	0	1	1	1	0	0.978261	-	1	0
Environmental sciences > Water/soil/effluents testing	0.135965	0.333333	0	0	0.5	0.327586	1	0	0	0	0	0	-	0	0.2
Environmental sciences > Food testing	0.197368	0	0.777778	0.5	0	0.551724	0.2	0	0	0	0	0	-	0	0.4
Environmental sciences > Ecology/ethology	0.105263	0	0.111111	0.5	0.5	0	0	0	1	0	0.75	0.0869565	-	0.0625	0.4
Environmental sciences > Other	0.0701754	0.333333	0.0555556	0	0	0.224138	0	0	0	0	0	0.0217391	-	0	0
Economics	0.0423358	0	0.0196078	0.210084	0.180147	0.00390625	0.0181818	0	0	0.0243902	0.031746	0.0327869	0.00763359	0.0179641	0.016129
Policy	0.00827251	0.00145985	0.000973236	0	0.000486618	0.000973236	0	0	0.000486618	0	0.00243309	0.000973236	0	0.000486618	0.000486618
Review	0.0467153	-	0.00681265	-	0.00681265	-	-	-	-	-	-	-	-	0.00583942	-
Review > systematic	0.864583	1	0.785714	1	0.928571	0.8	0.714286	1	1	0.666667	1	0.875	0.833333	1	0.714286
Review > narrative	0.135417	0	0.214286	0	0.0714286	0.2	0.285714	0	0	0.333333	0	0.125	0.166667	0	0.285714
Opinion	0.0121655	0	0.00326797	0.00840336	0.0147059	0	0	0.0377358	0	0.0487805	0.0555556	0.0273224	0.00763359	0.0239521	0.0268817
Other	0.00145985	0.0212766	0.00326797	0.00840336	0.00367647	0	0	0	0.0212766	0	0.015873	0	0	0.011976	0.00537634
Transdisciplinarity
1 discipline	0.658394	0.723404	0.79085	0.445378	0.533088	0.371094	0.836364	0.773585	0.787234	0.731707	0.785714	0.852459	0.877863	0.772455	0.553763
2 disciplines	0.289051	0.276596	0.169935	0.428571	0.341912	0.546875	0.163636	0.207547	0.212766	0.219512	0.174603	0.136612	0.10687	0.197605	0.408602
>2 disciplines	0.0525547	0	0.0392157	0.12605	0.125	0.0820312	0	0.0188679	0	0.0487805	0.0396825	0.010929	0.0152672	0.0299401	0.0376344
